# Supplementary material
Source: PubMed Central journal article supplement (PMC4876548)
Supplement: Supp_Fig1.pdf [file Supp_Fig1.pdf]

## Supplementary Data

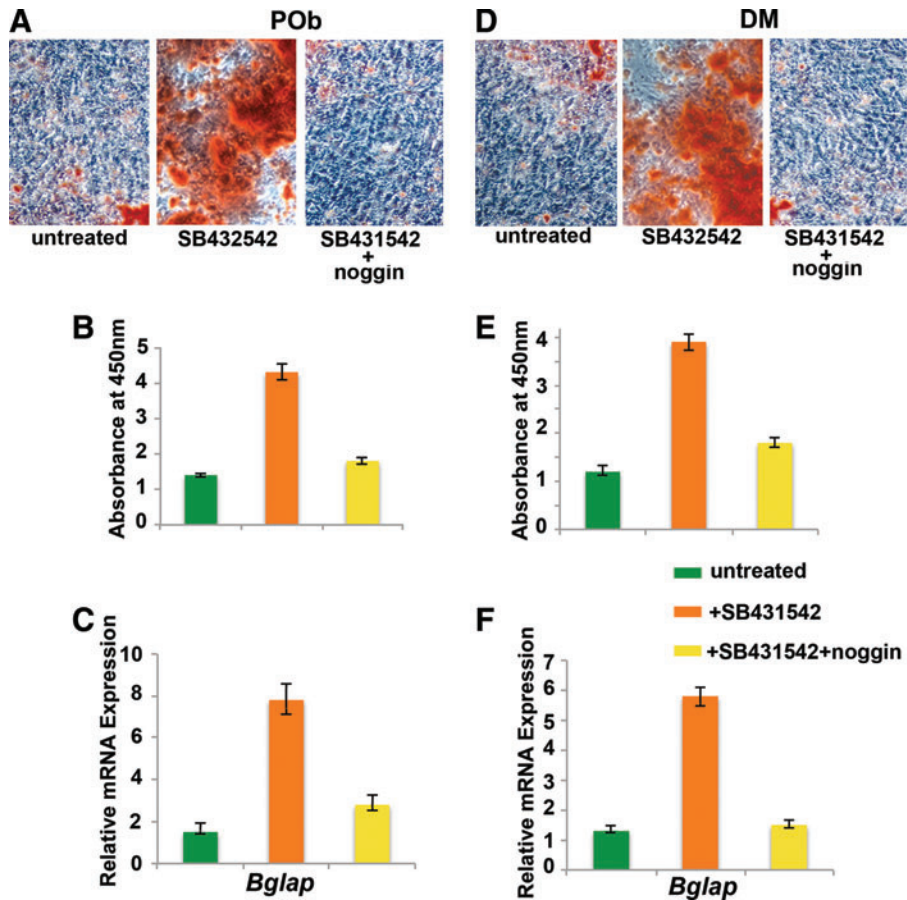

**SUPPLEMENTARY FIG. S1.** Noggin treatment suppresses the enhanced osteogenic differentiation elicited by SB431542. (A) Mineralization of the extracellular matrix detected by alizarin red staining performed on untreated, SB431542, and SB431542 plus noggin (250 ng/mL)-treated POB cells clearly demonstrates that noggin suppresses the robust osteogenic differentiation observed in SB431542-treated POB cells. (B) Quantification of alizarin staining showing a significant decrease in mineralization in POB cells undergoing osteogenic differentiation with 10  $\mu$ M SB431542 plus 250 ng/mL noggin. (C) Expression of *Bglap* is dramatically downregulated in the presence of noggin in POB cells treated with SB431542 as indicated by PCR analysis. (D) Alizarin red staining performed on untreated, SB431542, and SB431542 plus noggin (250 ng/mL)-treated DM cells indicates that noggin treatment abrogates also in these cells the enhanced osteogenesis triggered by SB431542. (E) Quantification of alizarin red staining shown in (D). (F) PCR analysis performed on DM cells shows similar downregulation of late osteogenic marker *Bglap* when cells are cotreated with SB431542 and noggin. DM, dura mater; POB, parietal bone osteoblast.
